1 **Title: The E3 ubiquitin ligase Pib1 regulates effective gluconeogenic shutdown in *S.***  
2 ***cerevisiae*.**

3 Vineeth Vengayil<sup>1,2</sup> and Sunil Laxman<sup>1</sup>

4

5 <sup>1</sup>Institute for Stem Cell Science and Regenerative Medicine (inStem)

6 GKVK Post, Bellary Road

7 Bangalore 560065

8 <sup>2</sup>Manipal Academy of Higher Education, Manipal, Karnataka, 576104, India

9

10 Correspondence: [sunil@instem.res.in](mailto:sunil@instem.res.in)

11

12 **Abstract**

13 Cells use multiple mechanisms to regulate their metabolic states depending on changes in  
14 their nutrient environment. A well-known example is the response of cells to glucose  
15 availability. In *S. cerevisiae* cells growing in glucose-limited medium, the re-availability of  
16 glucose leads to the downregulation of gluconeogenesis, the activation of glycolysis, and  
17 robust 'glucose repression'. However, our knowledge of the initial mechanisms mediating  
18 this glucose-dependent downregulation of the gluconeogenic transcription factors is  
19 incomplete. We used the gluconeogenic transcription factor Rds2 as a candidate with which  
20 to discover regulators of early events leading to glucose repression. Here, we identify a  
21 novel role for the E3 ubiquitin ligase Pib1 in regulating the stability and degradation of Rds2.  
22 Glucose addition to glucose-limited cells results in rapid ubiquitination of Rds2, followed by  
23 its proteasomal degradation. Through *in vivo* and *in vitro* experiments, we establish Pib1 as  
24 a ubiquitin E3 ligase that regulates Rds2 ubiquitination and stability. Notably, this Pib1  
25 mediated Rds2 ubiquitination, followed by proteasomal degradation, is specific to the  
26 presence of glucose. Pib1 is required for complete glucose repression, and enables cells to  
27 optimally grow in competitive environments when glucose becomes re-available. Our  
28 results reveal the existence of a Pib1 E3-ubiquitin ligase mediated regulatory program that  
29 mediates glucose-repression when glucose availability is restored.

30

31

## 32 Introduction

33 The uptake and utilization of nutrients are essential for cell growth and survival. Multiple  
34 metabolic pathways within cells make and break nutrients, and these pathways are tightly  
35 regulated depending on nutrient availability (1, 2). Since the nutrient environment of a cell  
36 is not constant, particularly for free-living microbes, cells rewire their metabolic pathways  
37 depending on the changes in nutrient availability (3–5). This ability of cells to rapidly and  
38 efficiently switch between different metabolic states is crucial for their survival and is  
39 closely coupled to the nutrient sensing machinery (6–8). Therefore, cells integrate multiple  
40 strategies to carry out efficient metabolic switching. Understanding these strategies are  
41 major areas of study.

42 *Saccharomyces cerevisiae* is an excellent model to understand conserved, general  
43 principles of metabolic state switching, due to the ease of controlling its metabolism (by  
44 altering nutrients provided), coupled with genetic and biochemical approaches to dissect  
45 regulatory mechanisms. A feature of *S. cerevisiae* metabolism is a preference for glucose as  
46 a carbon source, and where cells use fermentative metabolism (De Deken, 1966). This is the  
47 famous ‘Crabtree effect’, analogous to the Warburg effect in cancer cells, where cells  
48 preferentially use glucose over other available carbon sources, and minimize respiratory  
49 metabolism when glucose is present (De Deken, 1966; Diaz-Ruiz et al., 2011; Postma et al.,  
50 1989). Glucose availability, therefore, regulates a variety of cellular responses in yeast (12–  
51 14). Following glucose limitation, cells switch to a gluconeogenic state where alternate  
52 carbon sources are utilized, and upon glucose re-entry, cells switch back to a glycolytic state  
53 where alternate carbon source utilization is repressed (15, 16). Therefore, efficient glucose-  
54 induced catabolite repression is critical to ensure that upon glucose re-entry,  
55 gluconeogenesis is shut down (17–19). The initial responses occur immediately after glucose  
56 addition, through rapid changes in intracellular metabolite pools, driven by allosteric  
57 regulations and metabolic flux rewiring (20–22). Subsequently, the regulation of proteins  
58 that enforce the metabolic state switch, takes place by the interplay of transcriptional,  
59 translational, post-transcriptional and post-translational responses (23). Post-translation  
60 regulation (by signaling mediated events) allows rapid and dynamic regulation of protein  
61 levels and activity in response to a nutrient such as glucose (24). While we have a growing  
62 understanding of signaling events controlling cell growth with glucose as a carbon source

63 (25–27), several gaps remain in our understanding of the ‘off-switches’ that enable effective  
64 glucose repression in cells.

65 In particular, we have a limited understanding of how regulated protein turnover  
66 controls metabolic state switching when cells encounter a new nutrient source. Our  
67 understanding of regulatory events in this condition is biased towards ‘classic’ signaling,  
68 through the activation of nutrient-responsive kinases and phosphatases (28–30). Alternate  
69 modes of regulation, including selective protein turnover in response to changing nutrients  
70 (as opposed to ‘starvation’) remain poorly studied. The ubiquitin-mediated proteasomal  
71 degradation is a major pathway of selective protein degradation in eukaryotes (31, 32), but  
72 the role of the ubiquitin-proteasomal system in regulating metabolic switching is poorly  
73 understood. Since target specificity of ubiquitination is achieved by E3 ubiquitin ligases,  
74 which bind and specifically target proteins for ubiquitin conjugation (33, 34), there must be  
75 distinct E3 ligases activated by unique nutrient cues, which then ubiquitinate their  
76 substrates. However, only a few studies identify roles of E3 ubiquitin ligases in the context  
77 of glucose-mediated metabolic switching. In yeast, upon glucose depletion, the E3 ligase  
78 Grr1 targets the phosphofructokinase (Pfk27) enzyme for degradation, thereby inhibiting  
79 glycolysis (35). In the context of catabolite (glucose) repression, the E3 ligase complex  
80 SCF<sub>Ucc1</sub> regulates the degradation of the citrate synthase enzyme Cit2, thereby inhibiting the  
81 glyoxylate shunt (36). Further, the GID complex degrades the gluconeogenic enzymes Fbp1  
82 and Pck1, in the presence of glucose (Santt et al., 2008; Schork et al., 2002). Apart from  
83 these, little is known about the role of E3 ligases in regulating effective gluconeogenic  
84 shutdown. Similar examples from mammalian cells are even rarer (39). Notably, these  
85 studies are limited to only the regulation of relevant metabolic enzymes following glucose  
86 addition. For a complete metabolic state switch, the transcription factors which regulate  
87 these enzyme transcripts must themselves be regulated. In yeast, Rds2, Cat8, and Sip4 are  
88 the transcription factors that regulate gluconeogenic enzyme transcripts during growth in  
89 glucose-limited conditions (1, 40–42). Although these transcription factors are well studied  
90 in cells growing in glucose limitation, how these factors are regulated after glucose becomes  
91 available has surprisingly not been addressed (Figure 1A).

92 In this study, we sought to identify novel regulators of effective glucose repression,  
93 by focusing on the gluconeogenic transcription factors when glucose becomes available. For

94 this, we used the gluconeogenic transcription factor Rds2 as a candidate. Here, we discover  
95 that Rds2 is rapidly ubiquitinated and proteasomally degraded upon glucose addition. This is  
96 mediated by a specific E3 ubiquitin ligase - Pib1, in a glucose-dependent manner. Through *in*  
97 *vivo* and *in vitro* studies, we show a direct role of Pib1 in mediating glucose-dependent Rds2  
98 ubiquitination and degradation. Finally, Pib1 is required for competitive cell growth upon  
99 glucose re-entry. Collectively, our study identifies a novel role for a previously obscure E3  
100 ubiquitin ligase, in regulating gluconeogenic shutdown, and thereby facilitating effective  
101 glucose repression. More generally, our study exemplifies how E3-ubiquitin ligases can  
102 respond to changing nutrients, and serve as 'on' or 'off' switches to regulate cellular  
103 metabolic state.

104

## 105 **Results**

### 106 **Glucose regulates Rds2 protein levels.**

107 The transcription factors Rds2, Cat8, and Sip4 regulate gluconeogenesis under conditions of  
108 glucose limitation, by activating the expression of key enzymes required for  
109 gluconeogenesis. However, the mechanisms by which these proteins are shut down  
110 following glucose re-entry are not well understood (Figure 1A). In order to understand the  
111 processes involved in glucose-mediated regulation of these transcription factors, we chose  
112 Rds2 as a candidate, to specifically understand regulation after glucose addition. Using yeast  
113 cells with Rds2 chromosomally tagged at the carboxy-terminus with a FLAG epitope, we  
114 monitored the steady-state levels of Rds2 in cells grown in high glucose medium (2%  
115 glucose) or low glucose medium (2% glycerol and ethanol) using Western blots. The  
116 amounts of Rds2 protein was substantially lower in cells in high glucose medium compared  
117 to low glucose medium (Figure 1B). This suggested an existing mechanism to regulate Rds2  
118 protein levels depending on the availability of glucose. In order to understand the kinetics of  
119 Rds2 protein regulation when cells encounter glucose, we monitored Rds2 amounts over  
120 time in cells growing in glucose-limited medium (glycerol/ethanol as a carbon source) to  
121 which glucose was added. We observed a rapid decrease in Rds2 amounts after glucose  
122 addition (Figure 1C and Figure 1D), with a significant decrease observed as quickly as ~20  
123 minutes after glucose addition (Figure 1D). After ~30 minutes of glucose addition, the

124 amount of Rds2 protein was similar to that of the control (cells grown in 2% glucose  
125 medium). Further, no changes in Rds2 amounts were observed when glucose was not added  
126 (Figure 1C), reiterating that the change in Rds2 protein was glucose dependent. Overall,  
127 these results suggest that glucose addition activates a regulatory event that rapidly reduces  
128 the amount of Rds2 in cells.

129

### 130 **Glucose induces ubiquitination and proteasomal degradation of Rds2.**

131 Previous studies have identified roles of the protein degradation machinery in regulating the  
132 gluconeogenic enzymes Pck1 and Fbp1, in response to glucose addition (37). Protein  
133 degradation plays a role in rapid glucose-mediated catabolite inactivation of many proteins  
134 (Santt et al., 2008; Schüle et al., 2000). This is expected since decreases in protein amounts  
135 can be achieved swiftly via protein degradation, compared to changes in transcription or  
136 translation. Considering the decrease in Rds2 amounts within a few minutes after glucose  
137 re-entry, we hypothesized that glucose induces the regulated degradation of Rds2. Upon  
138 inspecting the amino acid sequence of Rds2, we found multiple lysine residues present in  
139 the protein (Figure 2A). Since ubiquitination (leading to protein degradation) occurs at the  
140 lysine residues of target proteins, we used multiple ubiquitination prediction programs  
141 (Wang 2017; Radivojac et al., 2011; Tung and Ho, 2008), to predict if these lysines were  
142 predicted to be ubiquitinated. We found that multiple lysine residues on Rds2 were strongly  
143 predicted to be likely ubiquitination sites (Figure 2A, Supplementary figure 1A). To test the  
144 possibility that Rds2 might indeed be ubiquitinated and degraded proteasomally, we first  
145 investigated if Rds2 was degraded by the proteasome. We treated cells with a proteasomal  
146 inhibitor-MG132, and monitored Rds2 protein amounts post glucose addition. Notably, Rds2  
147 amounts remained constant after glucose addition (Figure 2B and Figure 2C), in contrast to  
148 our earlier observations in cells without MG132 (shown in Figure 1). This strongly suggested  
149 that glucose addition results in the proteasomal degradation of Rds2. We therefore asked  
150 whether Rds2 is conditionally ubiquitinated in response to glucose. For this, we added  
151 glucose to cells in the presence of MG132, immunopurified Rds2, and probed for poly-  
152 ubiquitin conjugates (by Western blotting). We observed ubiquitin conjugates only in Rds2  
153 immunoprecipitates from glucose treated cells, but not in the control cells where glucose

154 was not added (Figure 2D). This suggests that Rds2 is specifically ubiquitinated rapidly in  
155 cells, in a glucose dependent manner. Collectively these data indicate that Rds2 is  
156 ubiquitinated and proteasomally degraded when glucose becomes available in the medium.

157

### 158 **The E3 ubiquitin ligase Pib1 interacts with and ubiquitinates Rds2.**

159 Ubiquitination is a multi-step process mediated by the coordinated action of three enzymes-  
160 E1 (ubiquitin activating), E2 (ubiquitin conjugating) and E3 (ubiquitin ligase). Ubiquitination  
161 substrate specificity depends on the E3 ubiquitin ligase, which selectively binds to and  
162 ubiquitinates the target protein (33). Therefore we hypothesized that in the presence of  
163 glucose, an unidentified E3 ubiquitin ligase should specifically ubiquitinate Rds2 and  
164 regulate its degradation (Figure 3A). We used YeastMine (47) to identify known interacting  
165 proteins of Rds2. This revealed, Pib1, a protein with E3 ligase activity, as an interacting  
166 protein partner of Rds2 (as seen in other high-throughput studies (48)). This putative  
167 interaction and possible regulatory function of Pib1 and Rds2 have remained unexplored.  
168 Therefore, to directly probe this putative interaction, we performed co-  
169 immunoprecipitation studies by immunopurified Pib1 (endogenously tagged at the carboxy-  
170 terminus with an HA epitope tag) and tested whether Rds2 associated with immunopurified  
171 Pib1. Notably, we performed these experiments using cells grown in (i) glucose-limited  
172 medium (2% glycerol and ethanol as a carbon source), (ii) without the addition of glucose, or  
173 (iii) 20 minutes after glucose addition. Strikingly, we observed a strong co-  
174 immunopurification of Rds2 with Pib1, only when Pib1 was isolated from cells minutes after  
175 glucose addition to the medium (Figure 3B). This strongly suggested that Pib1 interacts with  
176 Rds2, and specifically when glucose became available in the medium (Figure 3B).

177 These data, therefore, suggested a possible involvement of Pib1 in regulating  
178 glucose-mediated Rds2 ubiquitination. To directly address this possibility, we first  
179 monitored Rds2 amounts after glucose addition, in cells lacking Pib1 (*pib1Δ*). Notably, Rds2  
180 amounts remained stable and did not decrease, even ~30 minutes of glucose addition  
181 (Figures 3C and 3D). This was similar to the effect observed in cells treated with the  
182 proteasomal inhibitor MG132. Next, in order to determine whether Pib1 directly regulates  
183 Rds2 ubiquitination, we monitored the accumulation of poly-ubiquitin in Rds2

184 immunoprecipitates, in *pib1Δ* cells. Strikingly, no Rds2-polyubiquitin conjugates were  
185 observed even in the presence of glucose in *pib1Δ* cells (Figure 3E), in contrast to earlier  
186 observations made in wild-type cells. These data collectively show that Pib1 is required for  
187 the glucose-dependent ubiquitination and subsequent proteasomal degradation of Rds2  
188 (Figure 3E).

189

### 190 **Pib1 ubiquitinates Rds2 *in vitro*.**

191 In order to determine if Pib1 can directly act as an E3 ligase that ubiquitinates Rds2, we  
192 reconstituted an *in vitro* ubiquitination assay system. This assay requires incubating the  
193 substrate protein (Rds2), ATP and ubiquitin with purified E1, E2 and E3 enzymes in a suitable  
194 reaction buffer, followed by western blotting with anti-ubiquitin antibody to detect  
195 ubiquitin conjugates of the substrate (Figure 4A). *S. cerevisiae* has a single E1 ubiquitin-  
196 activating enzyme-Uba1 (49). We also utilized the E2 ubiquitin-conjugating enzyme Ubc4,  
197 since it has been used as an E2 ligase with Pib1 in a previous study (50). We first expressed  
198 recombinant Uba1 and Ubc4 (with C-terminal GST tags) in *E. coli*, and subsequently purified  
199 these proteins (Figure 4B). These proteins were then utilized in predetermined amounts in  
200 the *in vitro* assay. Separately, we immunoprecipitated Rds2 (substrate) from *pib1Δ* cells, and  
201 Pib1 (E3-ligase) from *rds2Δ* cells treated with glucose, to obtain sufficient amounts of the  
202 substrate and the E3 ligase. BSA was used as a control protein in the reaction to test the  
203 substrate specificity of Pib1. Using this assay, with permutations of individual combinations  
204 of reagents (as indicated in Figure 4C), robust Rds2-ubiquitin conjugates were observed  
205 exclusively when the E1, E2, Pib1 and ubiquitin (along with ATP) were present in the  
206 reaction mixture (Figure 4C). Pib1 did not ubiquitinate the control protein (BSA) in these  
207 conditions, and the E1 and E2 enzymes alone could not ubiquitinate Rds2 (Figure 4C). These  
208 data show that Pib1 specifically, directly ubiquitinates Rds2 *in vitro*. Finally, in order to  
209 understand the glucose specificity of this process, we performed this *in vitro* ubiquitination  
210 assay using Rds2 (substrate) immunopurified from cells growing in glucose-limited  
211 conditions, with or without glucose addition for ~20 minutes. Notably, no Rds2-ubiquitin  
212 conjugates were observed with Rds2 immunoprecipitated from cells without glucose  
213 addition, while clear poly-ubiquitination was observed in Rds2 immunopurified from cells



214 post glucose-addition (Figure 4D). This confirms that Pib1 mediated Rds2 ubiquitination is  
215 glucose dependent. Collectively, these data establish Pib1 as the E3 ubiquitin ligase that  
216 ubiquitinates Rds2 upon glucose re-availability, leading to Rds2 degradation.

217

### 218 **Pib1 mediates the effective shutdown of gluconeogenesis following glucose addition.**

219 If Pib1 is important for overall adaptation of cells to the presence of glucose (i.e. glucose  
220 repression), cells lacking Pib1 could be expected to show some defects in fully shutting  
221 down gluconeogenesis, after glucose re-entry. Therefore, since Rds2 transcriptionally  
222 activates the gluconeogenic enzyme genes - *FBP1* and *PCK1*, cells lacking Pib1 may  
223 accumulate these transcripts after glucose addition. To test this, we first estimated  
224 transcript levels of these genes in WT and *pib1Δ* cells at different time points after glucose  
225 addition by qRT-PCR. We observed significantly higher mRNA levels of both *FBP1* and *PCK1*  
226 in *pib1Δ* cells ~one hour post glucose addition, compared to the WT cells (Figure 5A). Finally,  
227 we tested the functional implications of the loss of Pib1, and inefficient shutting down of  
228 the gluconeogenic machinery (after glucose addition), using a competitive growth fitness  
229 assay with WT and *pib1Δ* cells. WT and *pib1Δ* cells (carrying different drug selection  
230 markers) were grown separately in glucose-replete, or glucose-limited medium, and equal  
231 numbers of these cells (based on absorbance at OD<sub>600</sub>) were mixed together in either  
232 glucose-replete or glucose-limited medium. Cells were plated on drug selection plates at  
233 different time intervals, and the relative number of WT and *pib1Δ* were calculated by colony  
234 counting. This experimental design is illustrated in Figure 4B. Under conditions when cells  
235 are transferred from glucose poor to glucose replete medium, the *pib1Δ* cells will not as  
236 efficiently switch to glycolysis (i.e. show efficient glucose repression) as WT cells, predicting  
237 that WT cells will outcompete *pib1Δ* cells in growth. Indeed, we observed that the relative  
238 number of WT cells is higher compared to *pib1Δ* cells after the switch to a glucose-replete  
239 medium, for around 4.5 hours (Figure 4B). Eventually, over longer times, the *pib1Δ* cells  
240 catch up with the WT cells. Note: in control experiments (where the cells were grown and  
241 mixed in glucose-replete medium), both WT and *pib1Δ* cells showed equal numbers of cells  
242 (Figure 4B). Also interestingly, when cells were grown and mixed together in glucose-  
243 deficient (glycerol/ethanol) medium, *pib1Δ* cells outcompeted WT cells around 6 hours after



244 cells were shifted to this medium (Figure 4B), further supporting a role for Pib1 in regulating  
245 a gluconeogenic state. Collectively, these data suggest that Pib1 regulates the ability of cells  
246 to efficiently switch to a glucose-repressed state, by controlling the amounts of the  
247 gluconeogenic regulator Rds2, upon glucose re-entry.

248

## 249 **Discussion**

250 In this study, we identify a functional role for the E3 ubiquitin ligase Pib1, as a mediator of  
251 effective gluconeogenic shutdown upon glucose re-entry into the medium. Pib1 binds to  
252 and mediates the glucose-dependent ubiquitination, and subsequent proteasomal  
253 degradation of the gluconeogenic transcription factor Rds2. Competitive growth  
254 experiments suggest a role for Pib1 in mediating effective glucose repression, suggesting a  
255 role for Pib1 in mediating an 'off-switch' for gluconeogenesis.

256 We first characterized glucose-mediated Rds2 regulation, and using this as our  
257 readout, our aim was to identify regulators involved in downregulating the gluconeogenic  
258 transcription factors, when glucose becomes available to cells. Upon glucose entry, Rds2  
259 protein amounts rapidly decrease over time (Figure 1). This glucose-mediated decrease in  
260 Rds2 amounts is due to its ubiquitin-mediated proteasomal degradation (Figure 2). While  
261 other studies have identified regulators gluconeogenic and glyoxylate cycle enzymes  
262 themselves, our study identifies a regulator of the transcription factor that controls  
263 gluconeogenesis shut-down upon glucose re-entry, and therefore the overall  
264 transcriptional state of the cell with changing nutrients.

265 Through this, we identify a glucose-dependent, ubiquitin-mediated signaling  
266 response, and a role for the E3 ubiquitin ligase Pib1 in this response. Strikingly, the  
267 interaction of Pib1 with Rds2 is very specific to the re-availability of glucose (Figure 3).  
268 Further, the loss of *PIB1* prevents Rds2 ubiquitination and its proteasomal degradation even  
269 in the presence of glucose (Figure 3). This interaction of Pib1 with Rds2, and its role in  
270 ubiquitinating Rds2 is direct, and glucose-dependent (Figure 4). Finally, we find that  
271 functionally, Pib1 regulates both the amounts of gluconeogenic enzyme transcripts (targets  
272 of Rds2), and cell growth and competitive fitness post glucose addition (Figure 5).

273 Collectively, these observations reveal a novel, functional role for Pib1 as a regulator of the  
274 glucose-mediated ubiquitination and proteasomal degradation of Rds2, and therefore  
275 effective glucose repression in yeast. While previous studies have suggested the role of Pib1  
276 in regulating vacuolar sorting (51), and a recent study has identified the exocyst subunit  
277 Sec3p as a Pib1 specific target in *S. pombe* (52), no function of Pib1 related to regulating  
278 responses to nutrients is currently known.

279 These results add a dimension to recent studies that suggest roles of E3 ubiquitin  
280 ligases as regulators of metabolic states (Nakatsukasa et al., 2015; Santt et al., 2008). The  
281 glucose-dependent Pib1 mediated signaling event which we identified takes place within  
282 minutes after glucose addition, reiterating the swiftness of the response. Since E3 ligases  
283 can ubiquitinate specific sets of substrates, an exciting area of investigation will be to  
284 identify substrates of Pib1, in a glucose-dependent context.

285 The ubiquitination machinery is itself regulated at multiple levels. Apart from E3  
286 ligases which conjugate ubiquitin to specific targets, the deubiquitination machinery  
287 removes ubiquitins from target proteins (54, 55). This involves deubiquitinase enzymes that  
288 bind to specific ubiquitinated proteins and cleaves the bound ubiquitins, to co-ordinately  
289 achieve a tight, reversible regulation of protein ubiquitination. The role of deubiquitinase  
290 enzymes in metabolic state switching has largely remained entirely unexplored. Our  
291 experimental approach, to observe early ubiquitination responses to the re-entry of  
292 nutrients, might reveal additional such regulators.

293 Finally, a less-explored, but an interesting signaling possibility is the cross-talk of  
294 ubiquitin machinery with other post-translational modifications, notably acetylation and  
295 phosphorylation (56, 57). How this cross-talk between PTMs activates or inhibits target  
296 protein ubiquitination, in the context of different nutrient cues, is poorly explored. Emerging  
297 studies suggest that acetylation and phosphorylation can regulate the ubiquitination and  
298 degradation of metabolic enzymes in other model systems (58). The combinatorial effect of  
299 these PTMs could, therefore, result in a highly sensitive, tightly controlled, rapidly  
300 responsive metabolic switching regulation machinery. Thus, the complex network of  
301 metabolic state regulation machinery involving E3 ubiquitin ligases, deubiquitinases,

302 kinases, phosphatases, acetylases, and deacetylases opens an interesting arena of post-  
303 translational modification mediated regulation of metabolic switching.

304

## 305 **Experimental procedures**

### 306 **Yeast strains, media and growth conditions**

307 The prototrophic CEN.PK strain (WT) was used in all experiments (59). All the strains used in  
308 this study are listed in Table S1. The gene deletion and C- terminal chromosomal tagging  
309 was done using the standard PCR based gene deletion and modification strategy (60). The  
310 media used in this study were glucose-limited media (1% Yeast extract, 2% peptone, 2%  
311 ethanol 10 and 1% glycerol) and glucose-replete media (1% Yeast extract, 2%peptone, and  
312 2% dextrose). For experiments involving the addition of glucose to cells grown in glucose-  
313 limited media, cells were initially grown at 30°C to an OD600 of 0.8 and glucose was added  
314 to a final concentration of 3%. All experiments involving MG132 were done in a *pdr5Δ*  
315 background to prevent the efflux of MG132 by the multidrug transporter protein Pdr5. A  
316 final concentration of 100 μM MG132 was used in all the experiments involving proteasomal  
317 inhibition.

### 318 **Protein extraction and western blotting**

319 When the cells reach an OD600 of 0.8, 10 ml of the culture cells were collected, pelleted and  
320 protein extraction was performed using trichloroacetic acid (TCA) extraction method.  
321 Briefly, the pelleted cells were resuspended in 400 μl 10 % TCA solution and the cells were  
322 lysed by bead beating (3 times, 20 seconds each with 1 min cooling in ice-water slurry  
323 between each cycle). Lysate extracts were centrifuged and the protein pellets thus obtained  
324 were resuspended in 400 μl SDS-glycerol buffer (7.3% SDS, 29.1% glycerol and 83.3 mM Tris  
325 base), and heated for 10 minutes at 100°C. The supernatant was collected after  
326 centrifugation (20000g/10 min), and total protein estimation was done using BCA assay  
327 (BCA assay kit, G-Biosciences). Samples were normalized (to maintain constant protein  
328 amounts) in SDS-glycerol buffer. The samples were run on 4-12 % Bis-Tris gels (Invitrogen)  
329 unless specified. Western blots were developed using the following antibodies – anti-FLAG  
330 M2 (mouse mAb, Sigma), anti-HA (12CA5 mouse mAb, Roche), anti-ubiquitin (P4D1 mouse

331 mAb, CST) and anti-FLAG (D6W5B rabbit mAb, CST). Horseradish peroxidase-conjugated  
332 secondary antibodies (mouse and rabbit) were obtained from Sigma. For developing the  
333 blot, standard enhanced chemiluminescence reagent (WesternBright ECL HRP substrate,  
334 Advansta) was used. Coomassie-stained gels were used as the loading controls. The  
335 quantification of the blots was done using ImageJ. The statistical significance was  
336 determined using Student's t-test (using GraphPad Prism 7.0)

### 337 **Immunoprecipitation and co-immunoprecipitation**

338 Cells were grown in glucose-limited media with or without glucose addition as specified and  
339 50 OD600 of cells were harvested by centrifugation. The collected cells were lysed in lysis  
340 buffer (50 mM HEPES buffer pH-7.5, 50 mM Sodium fluoride, 10% Glycerol, 150 mM KCl, 1  
341 mM EDTA, 2 mM Sodium orthovanadate, 2 mM PMSF, 0.1 mM Leupeptin, 0.02 mM  
342 Pepstatin, 0.25% Tween 20) using a mini bead beater. The lysate was incubated with  
343 Dynabeads Protein G (Invitrogen), conjugated with the required antibody, for 3 hrs at 4°C.  
344 The lysate was collected and the beads were washed 5 times in wash buffer (50 mM HEPES  
345 buffer pH-7.5, 50 mM Sodium fluoride, 10% Glycerol, 150 mM KCl, 1 mM EDTA, 2 mM  
346 Sodium orthovanadate, 0.05% Tween 20). The bound proteins were eluted by boiling the  
347 samples in SDS-PAGE sample buffer (for HA-tagged proteins), or by FLAG peptide elution  
348 (for FLAG-tagged proteins, using 0.5 mg/ml FLAG peptide). The samples were then subjected  
349 to western blotting. For co-immunoprecipitation studies with Pib1 and Rds2, HA-tagged Pib1  
350 was immunoprecipitated using the above-described method using and eluted by boiling in  
351 SDS-PAGE sample buffer. Rds2-FLAG was detected in the elution fraction by western  
352 blotting using anti-FLAG antibody.

### 353 ***In vivo* ubiquitination assay**

354 Rds2-FLAG was immunoprecipitated from glucose-treated and non-treated cultures using  
355 anti-FLAG M2 antibody (mouse mAb, Sigma) and eluted by FLAG peptide elution. The eluted  
356 proteins were run on a 10% polyacrylamide gel and subjected to western blotting. The  
357 presence of Rds2-FLAG in the lysate and elution fractions was detected using anti-FLAG  
358 antibody (D6W5B rabbit mAb, CST). In order to detect Rds2-ubiquitin conjugates, anti-  
359 ubiquitin antibody (P4D1 mouse mAb, CST) was used.

### 360 ***In vitro* ubiquitination assay**

361 Uba1-GST and Ubc4-GST were expressed in E.coli BL21(DE3) cells using pGST parallel  
362 plasmids, and purified using glutathione-affinity chromatography. Briefly, the lysate was  
363 passed through a column containing glutathione resin. The bound proteins were eluted  
364 using an elution buffer containing 10 mM reduced glutathione. The GST tags were removed  
365 using 6X His tagged TEV protease treatment, followed by passing it through a column  
366 containing glutathione resin. The TEV protease was removed by passing this sample through  
367 a Ni-NTA column. The concentrations of the purified proteins were estimated using  
368 Bradford estimation method. Rds2-FLAG was immunoprecipitated from *pib1Δ* cells and  
369 Pib1-FLAG from *rds2Δ* cells and eluted by FLAG peptide elution. The concentrations of these  
370 proteins were estimated by BCA protein estimation method (BCA assay kit, G-Biosciences).  
371 The *in vitro* ubiquitination assay was set up with the following components in the reaction  
372 mixture- 5 nM Uba1p, 100 nM Ubc4p, 20 nM Pib1-FLAG, 200 nM Rds2-FLAG, 0.02 mg/ml  
373 ubiquitin, 1X ubiquitination buffer (50 mM Tris-HCl pH-8, 5 mM MgCl<sub>2</sub>, 0.1% Tween 20, 1  
374 mM DTT), 2 mM ATP. The mixture was incubated for 20 minutes at 37°C and the reaction  
375 was terminated by adding SDS-PAGE sample buffer. The samples were run on a 10%  
376 polyacrylamide gel and ubiquitin chains were detected by western blotting with anti-  
377 ubiquitin antibody (P4D1 mouse mAb, CST).

### 378 **RNA isolation and RT-qPCR**

379 RNA isolation was done using a hot acid phenol extraction method. Briefly, cells were grown  
380 in glucose-limited media and 5 OD<sub>600</sub> cells were harvested by centrifugation. The pellets  
381 were resuspended in 400 μl TES solution (10 mM Tris-HCl pH 7.5, 10 mM EDTA and 0.5%  
382 SDS). To this, 400 μl acid phenol was added and mixed by vortexing. The resuspended  
383 pellets were incubated at 65°C for 60 minutes with intermittent vortexing. The supernatant  
384 was collected after centrifugation and subjected to another round of acid phenol treatment  
385 followed by incubation and intermittent vortexing as before. The supernatant obtained by  
386 centrifugation was treated with 400 μl chloroform, mixed and the aqueous phase obtained  
387 after centrifugation was collected. To this, 40 μl 3M sodium acetate, pH 5.3 and 1 ml ice-  
388 cold 100 % ethanol was added. This mixture was incubated in -20°C for 60 minutes. RNA was  
389 pelleted by centrifugation and washed in ice-cold 70 % ethanol. The pellet was air dried and

390 resuspended in nuclease-free water. The isolated RNA was quantified and treated with  
391 Turbo DNase (Invitrogen). DNase treated RNA was then used for cDNA synthesis using  
392 Superscript III reverse transcriptase (Invitrogen) as per the manufacturer's protocol. The  
393 cDNA was then used to perform qRT PCR using the KAPA SYBR FAST qRT PCR master mix kit  
394 (KK4602, KAPA Biosystems) as per the manufacturer's instructions. Actin (*ACT1*) was used as  
395 a control to normalize the values obtained. The mRNA fold change was calculated by a  
396 standard  $2^{-\Delta\Delta Ct}$  method. The statistical significance was determined using Student's t-  
397 test (using GraphPad Prism 7.0).

### 398 **Competitive growth fitness assay**

399 WT and *pib1Δ* cells carrying different drug selection markers were cultured separately in  
400 either glucose-replete or glucose-limited medium. At an OD<sub>600</sub> ~ 0.8, they were  
401 subcultured together at a starting OD<sub>600</sub> of 0.2 each, in either glucose-replete medium,  
402 glucose-limited medium or glucose-limited medium supplemented with glucose (final  
403 concentration of 3%). Samples were collected from this mixed culture at 0 hr, 1.5 hrs, 3 hrs,  
404 4.5 hrs, 6 hrs, and 7.5 hrs and were serially diluted to a final concentration of ~ 3000 cells  
405 per ml. 100 μl of this was plated on appropriate drug selection plates in triplicates and  
406 incubated at 30°C. The number of colonies was counted and the relative percentage of WT  
407 and *pib1Δ* colonies at each time point was calculated. These values obtained were plotted  
408 and the statistical significance was determined using Student's t-test (using GraphPad Prism  
409 7.0).

410

### 411 **Acknowledgements**

412 VV is supported by a DST-INSPIRE fellowship (DST/INSPIRE/03/2016/001546) from the  
413 Department of Science and Technology, Govt. of India. SL acknowledges support from a  
414 Wellcome Trust-DBT India Alliance Intermediate Fellowship (IA/I/14/2/501523), and  
415 institutional support from inStem and the Dept. of Biotechnology, Govt. of India.

416 **References**

- 417 1. Broach, J. R. (2012) Nutritional Control of Growth and Development in Yeast.  
418 *Genetics*. **192**, 73–105
- 419 2. Dechant, R., and Peter, M. (2008) Nutrient signals driving cell growth. *Curr. Opin. Cell*  
420 *Biol.* **20**, 678–87
- 421 3. Efeyan, A., Comb, W. C., and Sabatini, D. M. (2015) Nutrient-sensing mechanisms and  
422 pathways. *Nature*. **517**, 302–310
- 423 4. Zaman, S., Lippman, S. I., Zhao, X., and Broach, J. R. (2008) How *Saccharomyces*  
424 responds to nutrients. *Annu. Rev. Genet.* **42**, 27–81
- 425 5. Ljungdahl, P. O. O., and Daignan-Fornier, B. (2012) Regulation of Amino Acid,  
426 Nucleotide, and Phosphate Metabolism in *Saccharomyces cerevisiae*. *Genetics*. **190**,  
427 885–929
- 428 6. Ochocki, J. D., and Simon, M. C. (2013) Nutrient-sensing pathways and metabolic  
429 regulation in stem cells. *J. Cell Biol.* **203**, 23–33
- 430 7. Yuan, H. X., Xiong, Y., and Guan, K. L. (2013) Nutrient Sensing, Metabolism, and Cell  
431 Growth Control. *Mol. Cell.* **49**, 379–387
- 432 8. Lindsley, J. E., and Rutter, J. (2004) Nutrient sensing and metabolic decisions. *Comp.*  
433 *Biochem. Physiol. - B Biochem. Mol. Biol.* **139**, 543–559
- 434 9. De Deken, R. H. (1966) The Crabtree effect: a regulatory system in yeast. *J. Gen.*  
435 *Microbiol.* **44**, 149–56
- 436 10. Diaz-Ruiz, R., Rigoulet, M., and Devin, A. (2011) The Warburg and Crabtree effects: On  
437 the origin of cancer cell energy metabolism and of yeast glucose repression. *Biochim.*  
438 *Biophys. Acta - Bioenerg.* **1807**, 568–576
- 439 11. Postma, E., Verduyn, C., Scheffers, W. A., and Van Dijken, J. P. (1989) Enzymic analysis  
440 of the crabtree effect in glucose-limited chemostat cultures of *Saccharomyces*  
441 *cerevisiae*. *Appl. Environ. Microbiol.* **55**, 468–77



- 442 12. Schuller, H.-J. (2003) Transcriptional control of nonfermentative metabolism in the  
443 yeast *Saccharomyces cerevisiae*. *Curr Genet.* **43**, 139–160
- 444 13. Wang, Y., Pierce, M., Schnepfer, L., Güldal, C. G., Zhang, X., Tavazoie, S., and Broach, J.  
445 R. (2004) Ras and Gpa2 mediate one branch of a redundant glucose signaling pathway  
446 in yeast. *PLoS Biol.* **2**, 610–622
- 447 14. Zaman, S., Lippman, S. I., Schnepfer, L., Slonim, N., and Broach, J. R. (2009) Glucose  
448 regulates transcription in yeast through a network of signaling pathways. *Mol. Syst.*  
449 *Biol.* **5**, 1–14
- 450 15. Formation, T. H. E., Of, S., Adaptive, A. N., The, I. N., Of, A., and Substrate, I. T. S.  
451 (1947) THE FORMATION AND STABILIZATION OF AN ADAPTIVE ENZYME ( From the  
452 Depart , nent of Bacteriology and Immunology , Washington University School of  
453 Medicine , St . Louis ) The Journal of General Physiology
- 454 16. Fiechter, A., and Seghezzi, W. (1992) Regulation of glucose metabolism in growing  
455 yeast cells. *J. Biotechnol.* **27**, 27–45
- 456 17. Holzer, H. (1976) Catabolite inactivation in yeast. *Trends Biochem. Sci.*
- 457 18. Van De Poll, K. W., Kerkenaar, A., and Schamhart, D. H. J. (1974) Isolation of a  
458 regulatory mutant of fructose 1,6 diphosphatase in *Saccharomyces carlsbergensis*. *J.*  
459 *Bacteriol.* **117**, 965–970
- 460 19. Carlson, M. (1999) Glucose repression in yeast. *Curr. Opin. Microbiol.* **2**, 202–207
- 461 20. Van Den Brink, J., Canelas, A. B., Van Gulik, W. M., Pronk, J. T., Heijnen, J. J., De  
462 Winde, J. H., and Daran-Lapujade, P. (2008) Dynamics of glycolytic regulation during  
463 adaptation of *Saccharomyces cerevisiae* to fermentative metabolism. *Appl. Environ.*  
464 *Microbiol.* **74**, 5710–5723
- 465 21. Kresnowati, M. T. A. P., Van Winden, W. A., Almering, M. J. H., Ten Pierick, A., Ras, C.,  
466 Knijnenburg, T. A., Daran-Lapujade, P., Pronk, J. T., Heijnen, J. J., and Daran, J. M.  
467 (2006) When transcriptome meets metabolome: Fast cellular responses of yeast to  
468 sudden relief of glucose limitation. *Mol. Syst. Biol.* 10.1038/msb4100083

- 469 22. Hackett, S. R., Zanotelli, V. R. T., Xu, W., Goya, J., Park, J. O., Perlman, D. H., Gibney, P.  
470 A., Botstein, D., Storey, J. D., and Rabinowitz, J. D. (2016) Systems-level analysis of  
471 mechanisms regulating yeast metabolic flux. *Science (80-. )*. **354**, aaf2786-15
- 472 23. Yin, Z., Brown, A. J. P., and Hatton, L. (2000) Differential post-transcriptional  
473 regulation of yeast mRNAs in response to high and low glucose concentrations. *Mol.*  
474 *Microbiol.* **35**, 553–565
- 475 24. Tripodi, F., Nicastro, R., Reghellin, V., and Coccetti, P. (2015) Post-translational  
476 modifications on yeast carbon metabolism: Regulatory mechanisms beyond  
477 transcriptional control. *Biochim. Biophys. Acta - Gen. Subj.* **1850**, 620–627
- 478 25. Rolland, F., Winderickx, J., and Thevelein, J. M. (2002) Glucose-sensing and -signalling  
479 mechanisms in yeast. *FEMS Yeast Res.* **2**, 183–201
- 480 26. Xiong, Y., McCormack, M., Li, L., Hall, Q., Xiang, C., and Sheen, J. (2013) Glucose-TOR  
481 signalling reprograms the transcriptome and activates meristems. *Nature.* **496**, 181–  
482 186
- 483 27. Kim, J. H., Roy, A., Jouandot, D., and Cho, K. H. (2013) The glucose signaling network  
484 in yeast. *Biochim. Biophys. Acta - Gen. Subj.* **1830**, 5204–5210
- 485 28. Wilson, W. A., and Roach, P. J. (2002) Nutrient-regulated protein kinases in budding  
486 yeast. *Cell.* **111**, 155–8
- 487 29. Cantó, C., and Auwerx, J. (2013) AMP-activated protein kinase and its downstream  
488 transcriptional pathways. *Cell. Mol. life Sci.* **67**, 3407–3423
- 489 30. Bononi, A., Agnoletto, C., De Marchi, E., Marchi, S., Patergnani, S., Bonora, M., Giorgi,  
490 C., Missiroli, S., Poletti, F., Rimessi, A., and Pinton, P. (2011) Protein kinases and  
491 phosphatases in the control of cell fate. *Enzyme Res.* 10.4061/2011/329098
- 492 31. Komander, D., and Rape, M. (2012) The Ubiquitin Code. *Annu. Rev. Biochem.* **81**, 203–  
493 229
- 494 32. Glickman, M. H., and Ciechanover, A. (2002) The Ubiquitin-Proteasome Proteolytic  
495 Pathway: Destruction for the Sake of Construction. *Physiol. Rev.* **82**, 373–428

- 496 33. David, Y., Ternette, N., Edelmann, M. J., Ziv, T., Gayer, B., Sertchook, R., Dadon, Y.,  
497 Kessler, B. M., and Navon, A. (2011) E3 ligases determine ubiquitination site and  
498 conjugate type by enforcing specificity on E2 enzymes. *J. Biol. Chem.* **286**, 44104–  
499 44115
- 500 34. Hershko, A., and Ciechanover, A. (1998) THE UBIQUITIN SYSTEM. *Annu. Rev. Biochem.*  
501 **67**, 425–79
- 502 35. Benanti, J. a, Cheung, S. K., Brady, M. C., and Toczyski, D. P. (2007) A proteomic  
503 screen reveals SCFGrr1 targets that regulate the glycolytic-gluconeogenic switch. *Nat.*  
504 *Cell Biol.* **9**, 1184–91
- 505 36. Nakatsukasa, K., Nishimura, T., Byrne, S. D., Okamoto, M., Takahashi-Nakaguchi, A.,  
506 Chibana, H., Okumura, F., and Kamura, T. (2015) The Ubiquitin Ligase SCF<sup>Ucc1</sup> Acts as a  
507 Metabolic Switch for the Glyoxylate Cycle. *Mol. Cell.* **59**, 22–34
- 508 37. Schork, S. M., Thumm, M., and Wolf, D. H. (2002) Catabolite Inactivation of Fructose-  
509 1,6-bisphosphatase of *Saccharomyces cerevisiae* . *J. Biol. Chem.* **270**, 26446–26450
- 510 38. Olivier Santt, Thorsten PfirrmannBernhard Braun, J. J., Philipp Kimmig, Hartmut  
511 Scheel,§ Kay Hofmann, M. T., and Wolf, and D. H. (2008) The Yeast GID Complex, a  
512 Novel Ubiquitin Ligase (E3) Involved in the Regulation of Carbohydrate Metabolism.  
513 *Mol. Biol. Cell.* **19**, 3223–3333
- 514 39. Jin, X., Pan, Y., Wang, L., Zhang, L., Ravichandran, R., Potts, P. R., Jiang, J., Wu, H., and  
515 Huang, H. (2017) MAGE-TRIM28 complex promotes the Warburg effect and  
516 hepatocellular carcinoma progression by targeting FBP1 for degradation.  
517 *Oncogenesis.* 10.1038/oncsis.2017.21
- 518 40. Soontorngun, N., Larochele, M., Drouin, S., Robert, F., and Turcotte, B. (2007)  
519 Regulation of Gluconeogenesis in *Saccharomyces cerevisiae* Is Mediated by Activator  
520 and Repressor Functions of Rds2. *Mol. Cell. Biol.* **27**, 7895–7905
- 521 41. Hedges, D., Proft, M., and Entian, K. D. (1995) CAT8, a new zinc cluster-encoding gene  
522 necessary for derepression of gluconeogenic enzymes in the yeast *Saccharomyces*  
523 *cerevisiae*. *Mol. Cell. Biol.* **15**, 1915–1922

- 524 42. Vincent, O., and Carlson, M. (1998) activator , binds to the carbon source-responsive  
525 element of gluconeogenic genes. **17**, 7002–7008
- 526 43. Schüle, T., Rose, M., Entian, K. D., Thumm, M., and Wolf, D. H. (2000) Ubc8p functions  
527 in catabolite degradation of fructose-1, 6-bisphosphatase in yeast. *EMBO J.* **19**, 2161–  
528 7
- 529 44. Jyun-Rong Wang, Wen-Lin Huang, Ming-Ju Tsai, Kai-Ti Hsu, Hui-Ling Huang, S.-Y. H.  
530 10. 1093/bioinformatics/btw70. (2017) ESA-UbiSite: accurate prediction of human  
531 ubiquitination sites by identifying a set of effective negatives. *Bioinformatics* 2017; 33  
532 (5): 661-668. doi: *Bioinformatics*. **33**, 661–668
- 533 45. Radivojac, P., Vacic, V., Haynes, C., Cocklin, R. R., Mohan, A., Heyen, J. W., Goebel, M.  
534 G., and Iakoucheva, L. M. (2011) Identification, Analysis and Prediction of Protein  
535 Ubiquitination Sites. *Proteins Struct. Funct. Bioinforma.* **78**, 365–380
- 536 46. Tung, C., and Ho, S. (2008) Computational identification of ubiquitylation sites from  
537 protein sequences. *BMC Bioinformatics.* **9**, 310
- 538 47. Balakrishnan, R., Park, J., Karra, K., Hitz, B. C., Binkley, G., Hong, E. L., Sullivan, J.,  
539 Micklem, G., and Cherry, J. M. (2012) YeastMine-An integrated data warehouse for  
540 *Saccharomyces cerevisiae* data as a multipurpose tool-kit. *Database.* **2012**, 1–8
- 541 48. Uetz, P., Giot, L., Cagney, G., Mans, T. A., Judson, R. S., Knight, J. R., Lockshon, D.,  
542 Narayan, V., Srinivasan, M., Pochart, P., Qureshi-emili, A., Li, Y., Godwin, B., Conover,  
543 D., Kalb, T., Vijayadamodar, G., Yang, M., Johnston, M., Fields, S., and Rothberg, J. M.  
544 (2000) A comprehensive analysis of protein ± protein interactions in *Saccharomyces*  
545 *cerevisiae*. *Nature.* **403**, 623–627
- 546 49. McGrath, J. P., Jentsch, S., and Varshavsky, a (1991) UBA 1: an essential yeast gene  
547 encoding ubiquitin-activating enzyme. *EMBO J.* **10**, 227–236
- 548 50. Shin, M. E., Ogburn, K. D., Varban, O. A., Gilbert, P. M., and Burd, C. G. (2001) FYVE  
549 Domain Targets Pib1p Ubiquitin Ligase to Endosome and Vacuolar Membranes. *J.*  
550 *Biol. Chem.* **276**, 41388–41393

- 551 51. MacDonald, C., Winistorfer, S., Pope, R. M., Wright, M. E., and Piper, R. C. (2017)  
552 Enzyme reversal to explore the function of yeast E3 ubiquitin-ligases. *Traffic*. **18**, 465–  
553 484
- 554 52. Kampmeyer, C., Karakostova, A., Schenstrøm, S. M., Abildgaard, A. B., Lauridsen, A.,  
555 Jourdain, I., and Hartmann-petersen, R. (2017) The exocyst subunit Sec3 is regulated  
556 by a protein quality control pathway Caroline. 10.1074/jbc.M117.789867
- 557 53. Nakatsukasa, K., Okumura, F., and Kamura, T. (2015) Proteolytic regulation of  
558 metabolic enzymes by E3 ubiquitin ligase complexes: lessons from yeast. *Crit. Rev.*  
559 *Biochem. Mol. Biol.* **9238**, 1–14
- 560 54. Pickart, C. M., and Rose, I. A. (1985) Ubiquitin carboxyl-terminal hydrolase acts on  
561 ubiquitin carboxyl-terminal amides. *J. Biol. Chem.* **260**, 7903–7910
- 562 55. Komander, D., Clague, M. J., and Urbé, S. (2009) Breaking the chains: Structure and  
563 function of the deubiquitinases. *Nat. Rev. Mol. Cell Biol.* **10**, 550–563
- 564 56. Hunter, T. (2007) The Age of Crosstalk: Phosphorylation, Ubiquitination, and Beyond.  
565 *Mol. Cell.* **28**, 730–738
- 566 57. Caron, C., Boyault, C., and Khochbin, S. (2005) Regulatory cross-talk between lysine  
567 acetylation and ubiquitination: Role in control of protein stability. *BioEssays*. **27**, 408–  
568 415
- 569 58. Jiang, W., Wang, S., Xiao, M., Lin, Y., Zhou, L., Lei, Q., Xiong, Y., Guan, K. L., and Zhao,  
570 S. (2011) Acetylation Regulates Gluconeogenesis by Promoting PEPCK1 Degradation  
571 via Recruiting the UBR5 Ubiquitin Ligase. *Mol. Cell.* **43**, 33–44
- 572 59. J.P. van Dijken, J. B., Brambillac, L., Dubocd, P., Francoise, J. M., Gancedof, C.,  
573 Giusepping, M.L.F.HEijnenh, J. J., Hoarei, M., Langej, H. C., Maddenk, E. A.,  
574 Niederbergerb, P., Nielsend, J., J.L. Parroue , T. Petitf , D. Porroc, M. R., Rielg, N. van,  
575 Rizzij, M., and H.Y. Steensmaa, k , C.T. Verripsg, J. Vindeløvd, Pronka, J. T. (2000) An  
576 interlaboratory comparison of physiological and genetic properties of four  
577 *Saccharomyces cerevisiae* strains. *Enzyme Microb. Technol.* **26**, 706–714

- 578 60. Longtine, M. S., McKenzie, A., Demarini, D. J., Shah, N. G., Wach, A., Brachat, A.,  
579 Philippsen, P., and Pringle, J. R. (1998) Additional modules for versatile and  
580 economical PCR-based gene deletion and modification in *Saccharomyces cerevisiae*.  
581 *Yeast*. **14**, 953–961

582

583

584 **Figure legends**

585 **Figure1: Glucose regulates Rds2 protein levels**

586 A) An overview of the known transcriptional regulation of gluconeogenesis. In order to  
587 effectively switch to a glycolytic state after glucose re-entry, cells rapidly downregulate the  
588 gluconeogenic machinery. The gluconeogenic enzymes Pck1 and Fbp1 are regulated by a  
589 GID complex-mediated ubiquitination and proteasomal degradation. However, the  
590 regulation of the gluconeogenic transcription factors in the presence of glucose remains  
591 unknown.

592 B) Glucose availability regulates amounts of the gluconeogenic activator Rds2. Cells were  
593 grown in glucose-replete or glucose-limited (glycerol/ethanol) medium, and Rds2 protein  
594 amounts were compared by Western blotting using anti-FLAG antibody (see Experimental  
595 Procedures). Coomassie-stained gel showing total protein was used as the loading control. A  
596 representative blot (from three independent experiments) is shown.

597 C) Glucose addition results in a rapid reduction in Rds2 protein. Glucose was added to a final  
598 concentration of 3% to cells grown in glucose-limited medium. Cells were collected at  
599 different time points post glucose addition, and Rds2 amounts at each time were measured  
600 by Western blot using anti-FLAG antibody. Cells grown in glucose-limited medium  
601 (glycerol/ethanol) without the addition of glucose were used as a control. Loading control:  
602 Coomassie-stained gels showing total proteins.

603 D) Quantification of the blot in (C). The relative Rds2 amounts were quantified with respect  
604 to the Rds2 amount in cells collected at 0 minutes in glucose-limited medium, using ImageJ.  
605 Data are displayed as means  $\pm$  SD, n=3. \*p<0.05, \*\*p0.01, \*\*\*p<0.001.

606

607 **Figure 2: Glucose induces ubiquitination and proteasomal degradation of Rds2**

608 A) Putative ubiquitination sites in Rs2p. We used three different ubiquitination prediction  
609 tools for identifying putative ubiquitin binding lysine residues in Rds2. The high score lysine  
610 residues (scores greater than 0.5) recognized by at least two of the three analysis software



611 are shown in the schematic. Individual scores of all the lysine residues from the predictions  
612 are shown in Supplementary figure 1.

613 B) Glucose-dependent degradation of Rds2 is mediated by the proteasome. Cells expressing  
614 Rds2-FLAG grown in glucose-limited medium were treated with glucose and MG132, and  
615 Rds2 amounts were measured by Western blot. Note: these cells also lack the multi-drug  
616 transporter Pdr5, to allow the MG132 treatment. Cells grown in glucose-limited medium  
617 with the addition of glucose without MG132 addition were used as the control. Coomassie-  
618 stained gels were used as loading control.

619 C) Quantification of the blot in (B) using ImageJ. Data are displayed as means  $\pm$  SD, n=3.  
620 \*p<0.05, \*\*p0.01, \*\*\*p<0.001.

621 D) Glucose addition induces ubiquitination of Rds2. Rds2-FLAG was immunoprecipitated  
622 from glucose-treated and non-treated cells using anti-FLAG antibody. Rds2-ubiquitin  
623 conjugates were detected by western blotting using anti-ubiquitin antibody. A  
624 representative blot from at least three independent experiments is shown.

625

### 626 **Figure 3: E3 ubiquitin ligase Pib1 interacts with and ubiquitinates Rds2**

627 A) A schematic, illustrating a possible mechanism for glucose-mediated ubiquitination of  
628 Rds2, through an as yet unknown E3 ubiquitin ligase.

629 B) The E3 ubiquitin ligase Pib1 interacts with Rds2 in a glucose-dependent manner. Pib1-HA  
630 was immunoprecipitated from glucose-treated and non-treated cells using an anti-HA  
631 antibody. The immunoprecipitated fractions were tested for the presence of Rds2-FLAG,  
632 using an anti-FLAG antibody, by Western blotting.

633 C) Pib1 regulates glucose-mediated Rds2 degradation. Rds2-FLAG:*pib1* $\Delta$  cells grown in  
634 glucose-limited medium were treated with glucose, and Rds2 protein was measured at  
635 different time points by Western blotting.

636 D) Quantification of the blot in (C) using ImageJ. Data are displayed as means  $\pm$  SD, n=3.  
637 \*p<0.05, \*\*p0.01, \*\*\*p<0.001.

638 E) Pib1 regulates glucose-mediated Rds2 ubiquitination. Rds2-FLAG was  
639 immunoprecipitated from glucose-treated and non-treated cells, separated on a 4-12% bis-  
640 tris gel, and Rds2- ubiquitin conjugates were detected by western blotting using an anti-  
641 ubiquitin antibody.

642

643 **Figure 4: Pib1 ubiquitinates Rds2 *in vitro***

644 A) A schematic illustration of the *in vitro* ubiquitination assay design, to test for the ability of  
645 Pib1 to specifically ubiquitinate Rds2 *in vitro*.

646 B) Purification of recombinant E1 and E2 enzymes. GST tagged E1 (Uba1) and E2 (Ubc4)  
647 enzymes were recombinantly expressed in BL21 (DE3) cells, and purified by glutathione  
648 affinity chromatography. The purified fractions run on SDS-PAGE are shown.

649 C) Pib1p ubiquitinates Rds2p *in vitro*. An *in vitro* ubiquitination assay was set up with the  
650 following components in the reaction mixture- E1 (Uba1p,) E2 (Ubc4p), E3 (Pib1p-Flag), the  
651 substrate (Rds2p-Flag, or bovine serum albumin-BSA as a control), ubiquitin, MgCl<sub>2</sub> and ATP.  
652 The mixture was incubated for 20 minutes at 37°C and the reaction was terminated by  
653 adding SDS-PAGE sample buffer. The mixture was run on a 10% SDS-PAGE gel and western  
654 blotting was done using anti-FLAG (to detect Rds2-FLAG and Pib1-FLAG), or anti-Ubiquitin  
655 (to detect Rds2-ubiquitin conjugates) antibodies.

656 D) Pib1 mediated Rds2 ubiquitination is specific to the presence of glucose. An *in vitro*  
657 ubiquitination assay was performed using Rds2 immunoprecipitated from glucose-limited  
658 cells, either before glucose addition or 20 minutes after glucose addition, to determine if  
659 ubiquitination of Rds2 by Pib1 was glucose dependent. The samples were run on a 10% gel  
660 and ubiquitin conjugates were detected by western blotting with anti-ubiquitin antibody.

661

662 **Figure 5: Pib1 regulates the effective shutdown of gluconeogenesis following glucose  
663 addition.**

664 A) *PCK1* and *FBP1* mRNAs are higher in *pib1Δ* cells, compared to WT cells, after glucose  
665 addition. The mRNA levels of *PCK1* and *FBP1* were measured using qRT PCR in WT and *pib1Δ*  
666 cells, at different time points after glucose addition. Fold changes in mRNA amounts are  
667 presented. Data are displayed as means ± SD, n=3. \*p<0.05, \*\*p<0.01, \*\*\*p<0.001.

668 B) *pib1Δ* cells show a fitness defect in competitive growth assays upon glucose addition. WT  
669 and *pib1Δ* cells were cultured in either glucose-replete or glucose-limited medium, and  
670 equal amounts of cells were mixed together, and transferred to glucose-replete medium,  
671 glucose-limited medium (2% glycerol/ethanol), or glucose-limited medium supplemented  
672 with glucose (final concentration of 3%), with a starting cell density based on OD<sub>600</sub> of 0.2  
673 each. This experimental design is illustrated. Subsequently, cells were collected and plated  
674 on appropriate selection plates, to quantify relative amounts of each genetic background.  
675 The relative genetic background is shown. Data are displayed as means ± SD, n=3. \*p<0.05,  
676 \*\*p<0.01, \*\*\*p<0.001, significance is based on a student's T-test.

677 C) A proposed model illustrating the role of Pib1 in regulating glucose-mediated Rds2  
678 degradation. In glucose-limited cells, Rds2 transcriptionally activates the expression of  
679 different gluconeogenic and glyoxylate cycle enzymes, enforcing a gluconeogenic state.  
680 Upon glucose addition, Pib1 interacts with and ubiquitinates Rds2, targeting it for  
681 proteasomal degradation.

682

683 **Supplementary Figure legends**

684

685 **Supplementary Figure 1: Lysine residues in Rds2, with their predicted scores for**  
686 **ubiquitination**

687 Multiple prediction programs (Ubpred, Ubisite, and Ubipred) were used to find out the  
688 probable ubiquitination sites in Rds2. The lysine residues present in Rds2, along with the  
689 scores for ubiquitination, obtained from the predictions are indicated.

690

691 **Supplementary Figure 2: Pib1 protein before and after glucose addition to cells in glucose-**  
692 **limited medium**

693 Pib1 protein amounts were analyzed by Western blotting, using samples collected from  
694 glucose-limited medium, before and at different time points after glucose addition. No  
695 change in the protein levels was observed. Coomassie-stained gels were used as loading  
696 control.

697

**A**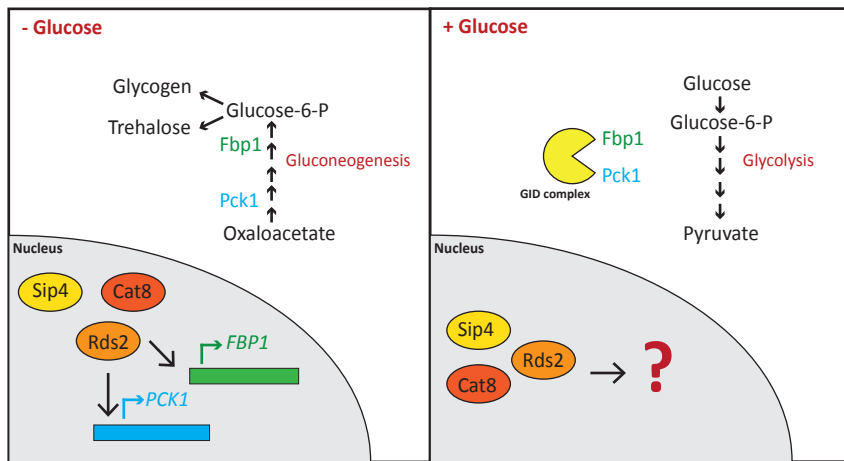**B**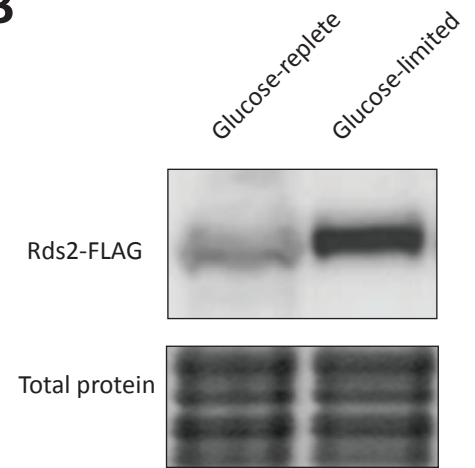**C**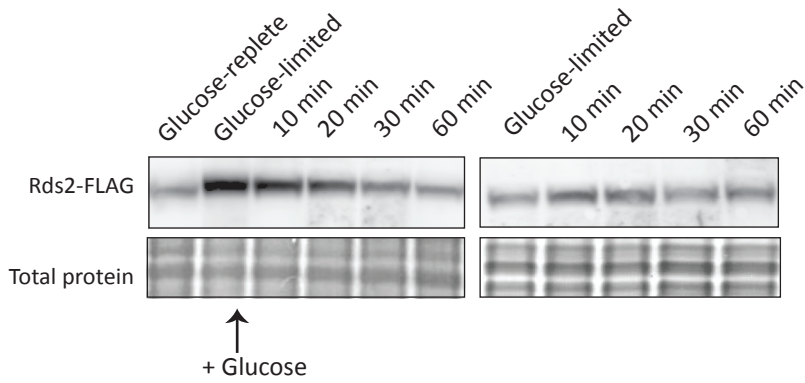**D**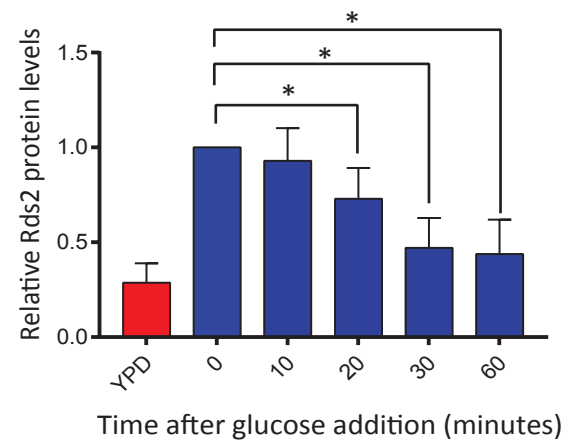

Figure 1

**A**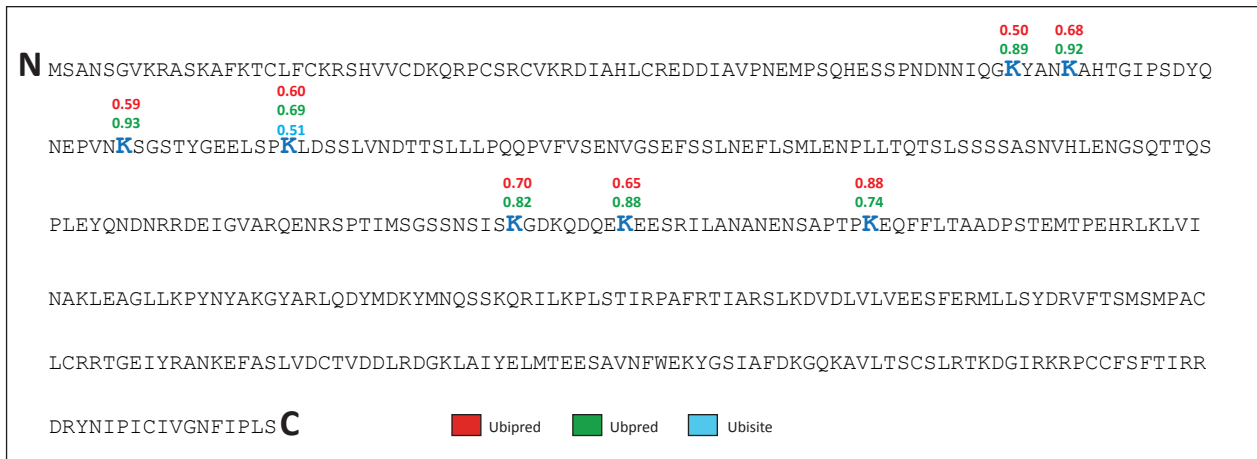**B**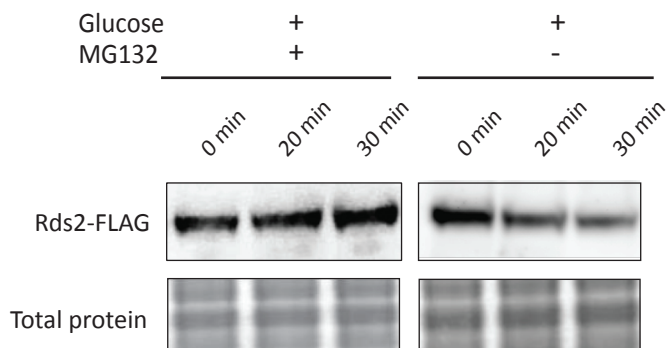**C**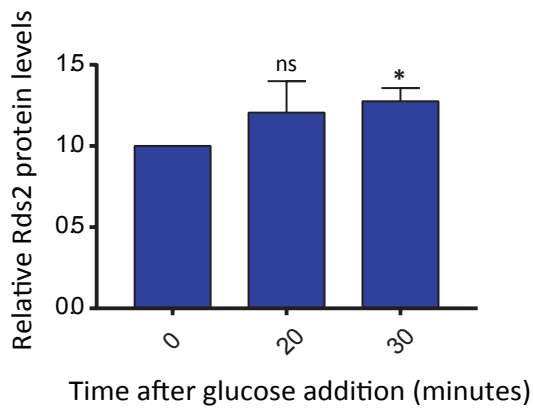**D**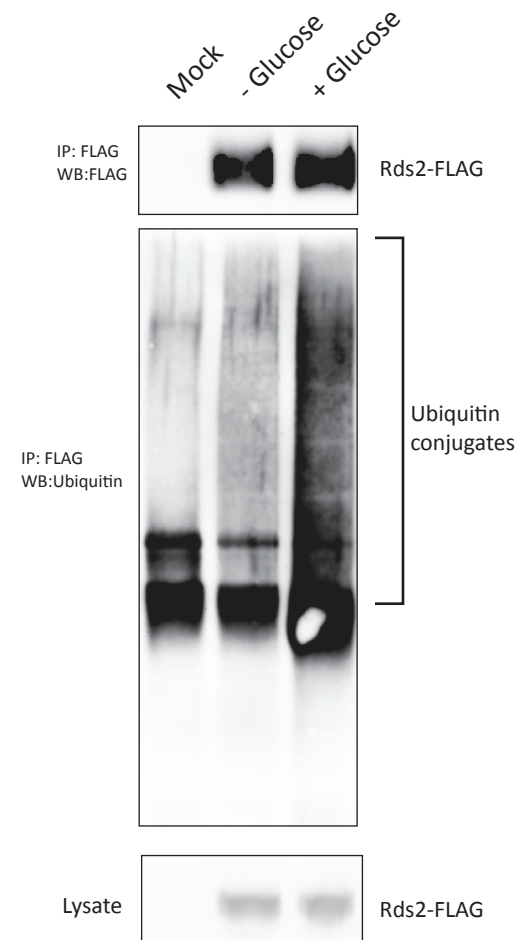

Figure 2

**A**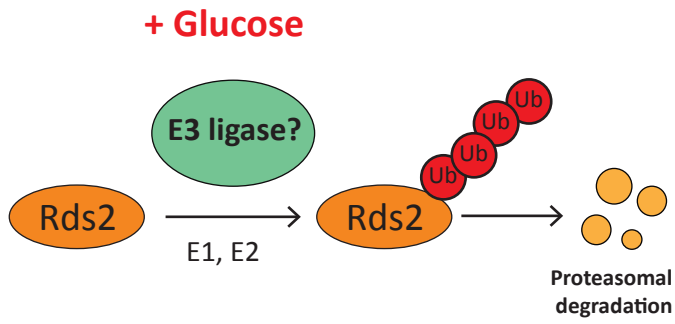**B**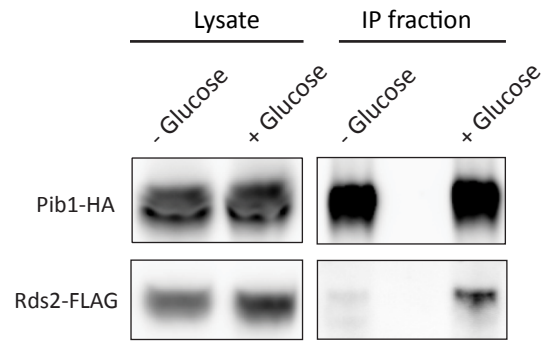**C**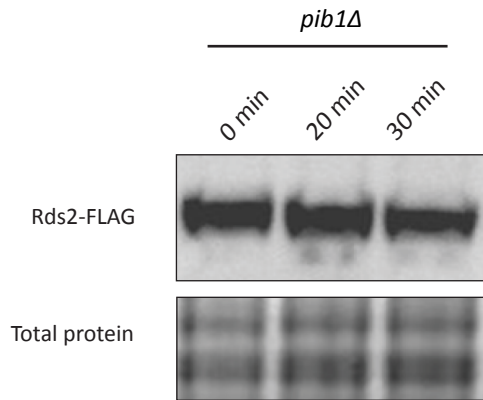**D**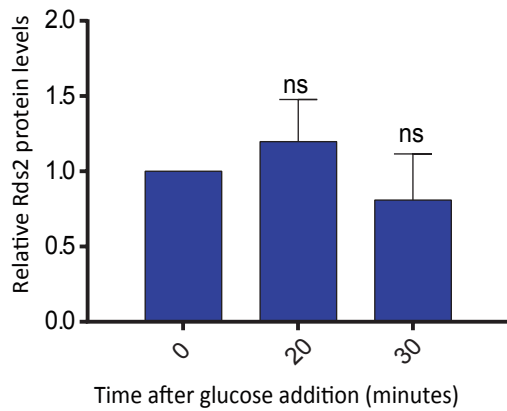**E**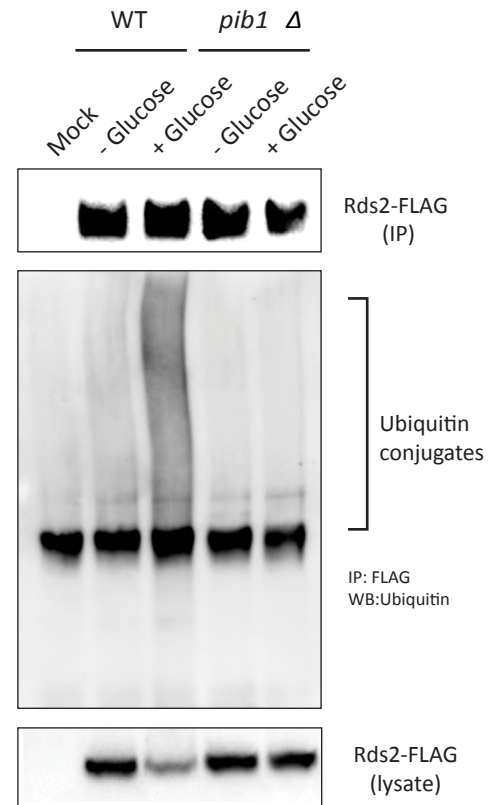

Figure 3



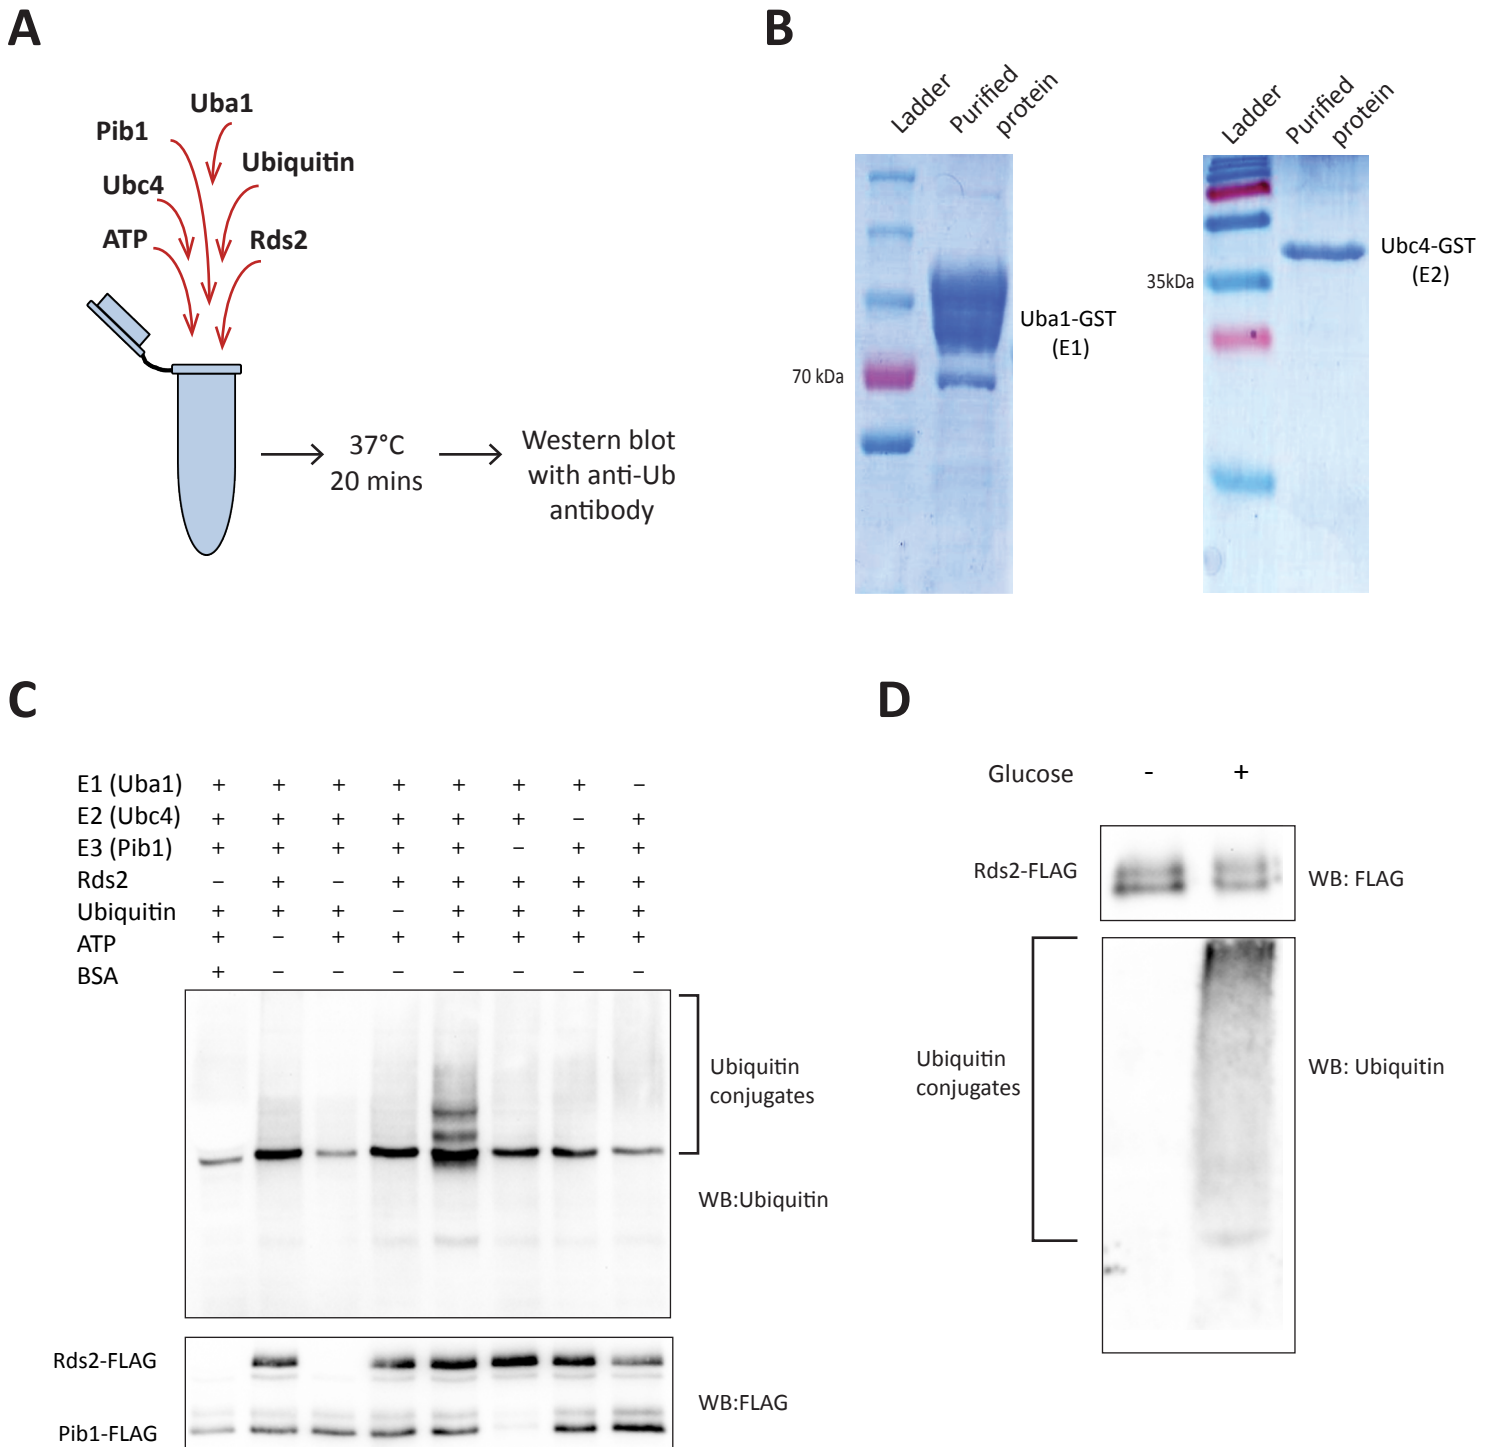

Figure 4

**A**

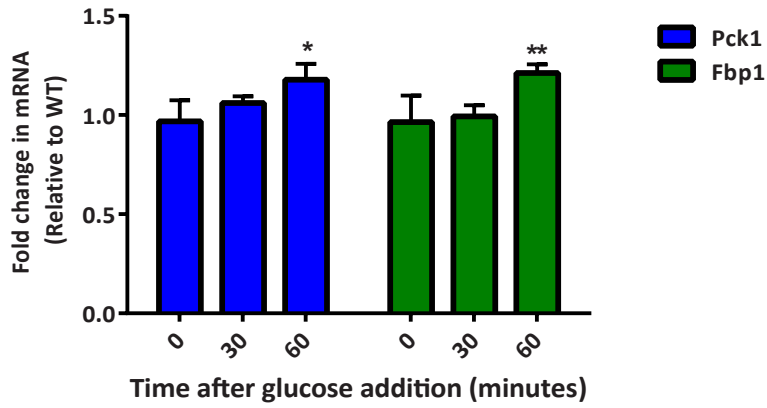

**B**

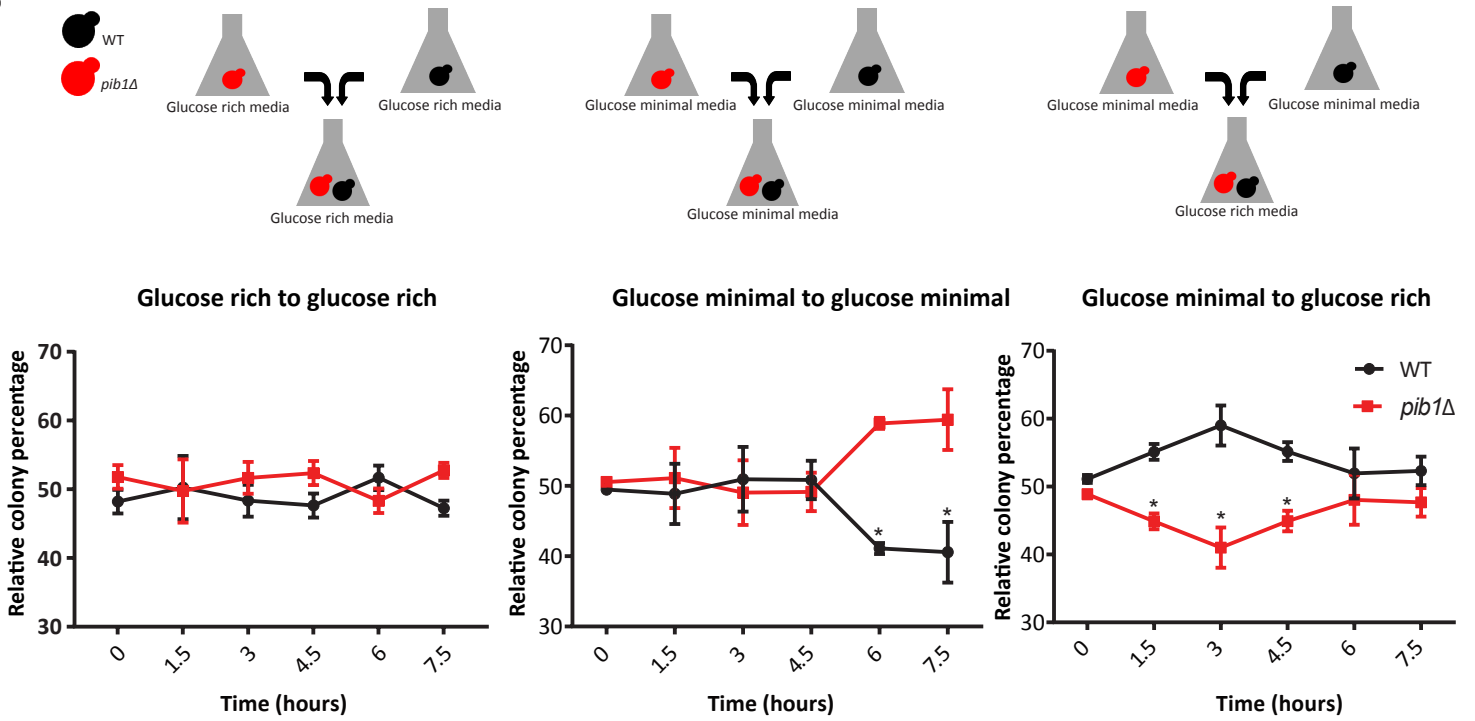

**C**

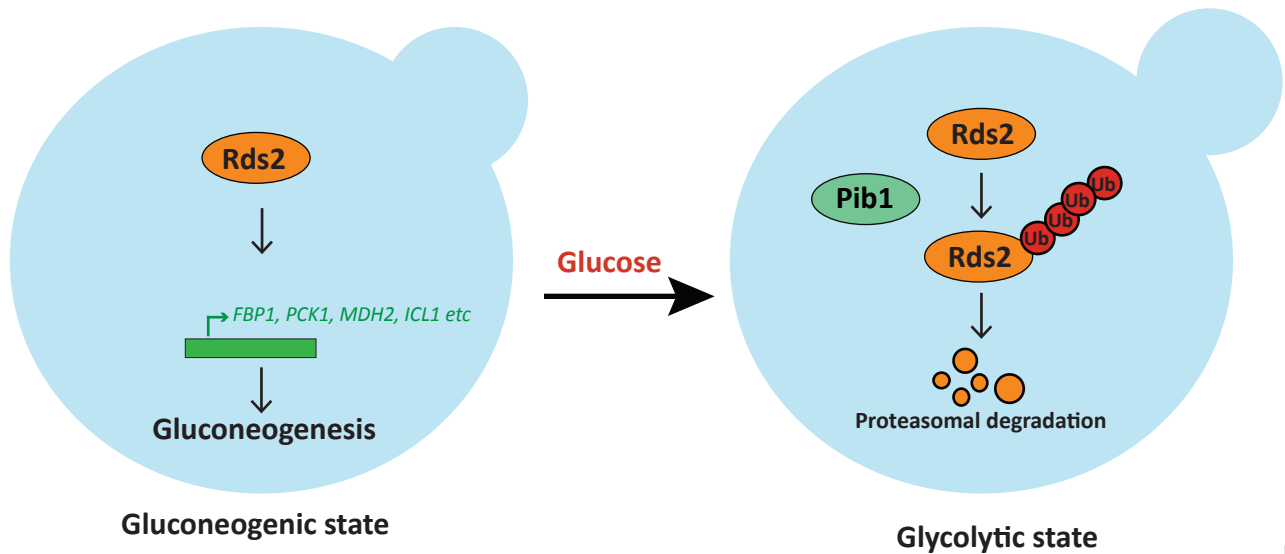

Figure 5

**Supplementary figure 1 : Lysine residues in Rds2 with their predicted scores for ubiquitination**

| SI no. | Residue number | Score   |        |        |
|--------|----------------|---------|--------|--------|
|        |                | Ubipred | Ubpred | Ubsite |
| 1      | 8              | 0.74    | 0.21   | -      |
| 2      | 12             | 0.46    | 0.09   | -      |
| 3      | 15             | 0.34    | 0.12   | -      |
| 4      | 21             | 0.53    | 0.14   | -      |
| 5      | 29             | 0.28    | 0.21   | -      |
| 6      | 38             | 0.09    | 0.29   | -      |
| 7      | 72             | 0.50    | 0.89   | -      |
| 8      | 76             | 0.68    | 0.92   | -      |
| 9      | 92             | 0.59    | 0.93   | -      |
| 10     | 104            | 0.60    | 0.69   | 0.51   |
| 11     | 207            | 0.70    | 0.82   | -      |
| 12     | 210            | 0.43    | 0.68   | -      |
| 13     | 215            | 0.65    | 0.88   | -      |
| 14     | 233            | 0.88    | 0.74   | -      |
| 15     | 254            | 0.39    | 0.59   | 0.71   |
| 16     | 260            | 0.44    | 0.49   | 0.60   |
| 17     | 267            | 0.35    | 0.20   | 0.56   |
| 18     | 273            | 0.44    | 0.45   | -      |
| 19     | 284            | 0.61    | 0.34   | -      |
| 20     | 291            | 0.66    | 0.10   | -      |
| 21     | 296            | 0.41    | 0.13   | -      |
| 22     | 313            | 0.47    | 0.44   | 0.50   |
| 23     | 256            | 0.26    | 0.39   | -      |
| 24     | 373            | 0.30    | 0.51   | 0.52   |
| 25     | 391            | 0.39    | 0.38   | -      |
| 26     | 399            | 0.47    | 0.48   | -      |
| 27     | 402            | 0.64    | 0.36   | -      |
| 28     | 413            | 0.30    | 0.14   | -      |
| 29     | 418            | 0.33    | 0.20   | -      |

-

**Supplementary figure 2 : Pib1 protein levels before and after glucose addition to glucose-limited media**

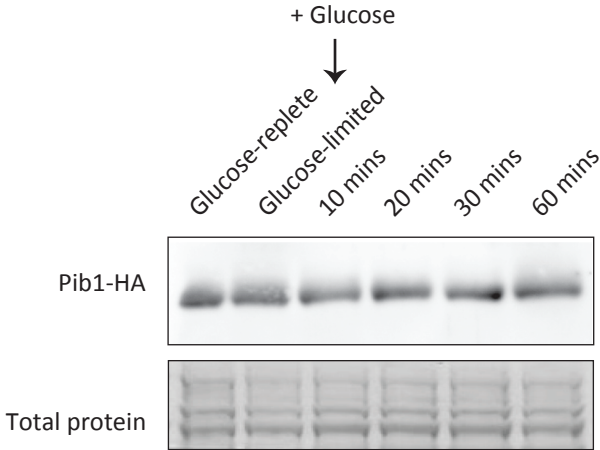

Source: https://www.biorxiv.org/content/10.1101/673657v1.full.pdf
